# Supplementary material
Source: publisher site journal article supplement (https://www.dovepress.com/article/342214)
Supplement: Supplementary file 1 [file get_supplementary_file.php]

## Supplementary Material

**Title:** Predicting neoadjuvant chemoradiotherapy response in locally advanced rectal cancer using tumor-infiltrating lymphocytes density

**Authors:** Yao Xu,<sup>1,2,\*</sup> Xiaoying Lou,<sup>3,\*</sup> Yanting Liang,<sup>4,2,\*</sup> Shenyang Zhang,<sup>3</sup> Shangqing Yang,<sup>5</sup> Qicong Chen,<sup>6</sup> Zeyan Xu,<sup>1,2</sup> Minning Zhao<sup>2,7</sup>, Zhenhui Li,<sup>8,\*</sup> Ke Zhao,<sup>2</sup> Zaiyi Liu<sup>1,2</sup>

### Affiliations:

<sup>1</sup>School of Medicine, South China University of Technology, Guangzhou, 510006, China;

<sup>2</sup>Department of Radiology, Guangdong Provincial People's Hospital, Guangdong Academy of

Medical Sciences, Guangzhou, 510080, China; <sup>3</sup>Department of Pathology, The Sixth Affiliated

Hospital of Sun Yat-sen University, Guangzhou, 510665, China; <sup>4</sup>Guangdong Cardiovascular

Institute, Guangdong Provincial People's Hospital, Guangdong Academy of Medical Sciences,

Guangzhou, 510080, China; <sup>5</sup>School of Life Science and Technology, Xidian University, Xian,

710071, China; <sup>6</sup>Institute of Computing Science and Technology, Guangzhou University,

Guangzhou, 510006, China; <sup>7</sup>The Second School of Clinical Medicine, Southern Medical

University, Guangzhou, 510080, China; <sup>8</sup>Department of Radiology, the Third Affiliated Hospital of

Kunming Medical University, Yunnan Cancer Hospital, Yunnan Cancer Center, Kunming, 650118,

China

\*These authors contributed equally to this work.

Correspondence: Zaiyi Liu

Department of Radiology, Guangdong Provincial People's Hospital, Guangdong Academy of  
Medical Sciences, 106 Zhongshan Er Road, Guangzhou, China

Email liuzaiyi@gdph.org.cn

Ke Zhao

Department of Radiology, Guangdong Provincial People's Hospital, Guangdong Academy of  
Medical Sciences, 106 Zhongshan Er Road, Guangzhou, China

Email zhaoke@gdph.org.cn

## **Supplementary Methods**

### **Inclusion criteria:**

Those patients diagnosed as who meet all of the following inclusion criteria were enrolled into this study:

- (a) Patients who diagnosed as locally advanced rectal cancer (LARC, cT3–4b or any T, N+, M0) by imaging or pathological examination;
- (b) Rectal cancer within 12cm from the anal verge;
- (c) Underwent a tumor biopsy before neoadjuvant chemoradiotherapy (nCRT) and subsequent rectal resection;
- (d) No other treatment before nCRT;
- (e) Radical surgery was performed after nCRT.

### **Exclusion criteria:**

- (a) Patients with distant metastases at the time of diagnosis or with Lynch syndrome, ulcerative colitis or familial adenomatous polyposis;
- (b) Patients with missing or ambiguous data that could not be evaluated for the stromal region of the tumor;
- (c) Patients who died within 30 days of nCRT and surgery;

(d) Patients who did not complete nCRT.

**Supplementary Table S1** Correlation analysis of TILs density with other potential factors

|                              | Total       | High TILs density | Low TILs density | P      |
|------------------------------|-------------|-------------------|------------------|--------|
|                              | N = 210     | N = 105           | N = 105          |        |
| <b>Differentiation grade</b> |             |                   |                  | 0.471  |
| Well or moderate             | 202 (96.2%) | 102 (97.1%)       | 100 (95.2%)      |        |
| Poor                         | 8 (3.8%)    | 3 (2.9%)          | 5 (4.8%)         |        |
| <b>cT status</b>             |             |                   |                  | 0.768  |
| cT2                          | 8 (3.8%)    | 3 (2.9%)          | 5 (4.8%)         |        |
| cT3                          | 150 (71.4%) | 76 (72.4%)        | 74 (70.5%)       |        |
| cT4                          | 52 (24.8%)  | 26 (24.7%)        | 26 (24.7%)       |        |
| <b>cN status</b>             |             |                   |                  | 0.139  |
| cN0                          | 35 (16.7%)  | 19 (18.1%)        | 16 (15.2%)       |        |
| cN1                          | 82 (39.0%)  | 34 (32.4%)        | 48 (45.7%)       |        |
| cN2                          | 93 (44.3%)  | 52 (49.5%)        | 41 (39.1%)       |        |
| <b>CEA level</b>             |             |                   |                  | 0.212  |
| Normal                       | 117 (55.7%) | 63 (60%)          | 54 (51.4%)       |        |
| Abnormal                     | 93 (44.3%)  | 42 (40%)          | 51 (48.6%)       |        |
| <b>CA19–9 level</b>          |             |                   |                  | 0.001* |
| Normal                       | 162 (77.1%) | 91 (86.7%)        | 71 (67.6%)       |        |
| Abnormal                     | 48 (22.9%)  | 14 (13.3%)        | 34 (32.4%)       |        |

**Note:** \*P<0.05. The threshold value for CEA was 5ng/ml, and 0–5ng/ml was regard as normal.

The threshold value for CA19-9 was 27 U/ml, and 0–27 U/ml was regard as normal.

**Abbreviations:** TILs, tumor-infiltrating lymphocytes; CEA, carcinoembryonic antigen; CA19–9: carbohydrate antigen 19–9.
